# Supplementary material
Source: publisher figshare collection journal article supplement (https://gsajournals.figshare.com/articles/dataset/_/7897544)
Supplement: Supplementary file 1 [file 1]

## SUPPLEMENTAL INFORMATION APPENDIX

**Table S1. Genotypes, phenotypes, abbreviations.**

| <i>Phenotype</i> | ♂ <i>genotypes</i> | ♀ <i>genotypes</i>                              |
|------------------|--------------------|-------------------------------------------------|
| <i>Ry</i>        | D                  | D/D, D/r2                                       |
| <i>R</i>         | none               | D/+, D/r1                                       |
| <i>y</i>         | r2                 | r2/r2                                           |
| <i>WT</i>        | +, r1              | +/+, +/r1, +/r2, r1/r1, r1/r2,<br>+/r2m, r1/r2m |
| <i>Rm</i>        | none               | D/r2m                                           |
| <i>m</i>         | r2m                | r2/r2m, r2m/r2m                                 |

R – dsRed phenotype

y – yellow phenotype

WT – wild-type phenotype

m – mosaic for eye phenotype

D – drive allele with disrupted target gene

r1 – type 1 resistance allele, preserves gene function

r2 – type 2 resistance allele, disrupts gene function

r2m – mosaic for type 2 resistance allele

– wild-type allele

♀ / ♂ – female / male

w - white-eye phenotype (used in Data S1-S3 and S6)

### Drive parameter calculations

The listed equations show how different drive parameters were calculated for gene drive flies after phenotyping the progeny resulting from a cross of D/+ drive heterozygotes together with wild-type individuals. Numbers of flies in equations refer to the counts of progeny with the listed phenotypes. See the Supplemental Data Sets for specific individual rate calculations.

$$\text{Drive inheritance rate} = \frac{\text{dsRed Flies}}{\text{total flies}}$$

$$\text{Drive conversion rate (for D/+ flies)} = 2 * \frac{\text{dsRed Flies}}{\text{total flies}} - 1$$

$$\text{r2 inheritance rate (based on male progeny)} = \frac{y \text{ } \delta}{\text{total } \delta}$$

$$\text{Germline r2 formation rate (based on male progeny)} = 2 * \frac{y \text{ } \delta}{\text{total } \delta}$$

$$\text{Male (progeny) wild-type (phenotype) rate} = 2 * \frac{WT \text{ } \delta}{\text{total } \delta}$$

$$\text{Embryo r2 allele formation rate in flies inheriting a drive allele} = \frac{Ry \text{ } \delta}{R \text{ } \delta + Ry \text{ } \delta + Rm \text{ } \delta}$$

$$\text{Embryo r2 allele mosaicism rate in flies inheriting a drive allele} = \frac{Rm \text{ } \delta}{R \text{ } \delta + Ry \text{ } \delta + Rm \text{ } \delta}$$

$$\text{Embryo r2 allele formation rate in flies not inheriting a drive allele} = \frac{y \text{ } \delta}{WT \text{ } \delta + y \text{ } \delta + m \text{ } \delta}$$

$$\text{Embryo r2 allele mosaicism rate in flies not inheriting a drive allele} = \frac{m \text{ } \delta}{WT \text{ } \delta + y \text{ } \delta + m \text{ } \delta}$$

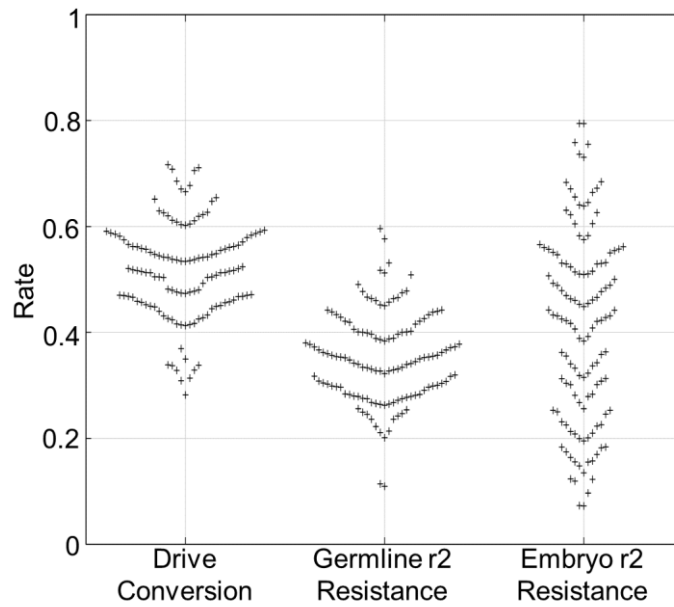

**Figure S1 Variation in drive performance parameters among the DGRP lines.** Each symbol on the plot represents the average rate for a single DGRP line.

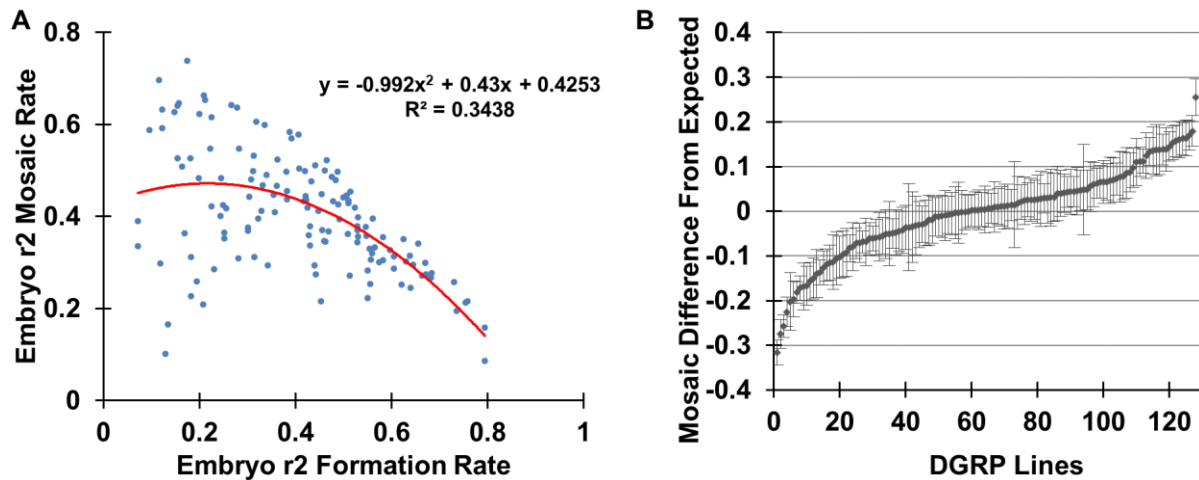

**Figure S2 The relation between the full embryo r2 resistance allele formation rate and the mosaic embryo rate.** (A) Each point represents values from a single DGRP line. A second-order polynomial was fitted to the data to determine the average expected rate of mosaic daughters (also inheriting the drive) from crosses between drive/wild-type heterozygote females and wild-type males based on the rate of daughters with full embryo r2 alleles (and also inheriting the drive). (B) The difference between the observed rate of mosaicism and the expected rate based on the full embryo r2 rate was plotted. Each point represents the difference value  $\pm$  standard error in a single DGRP line.

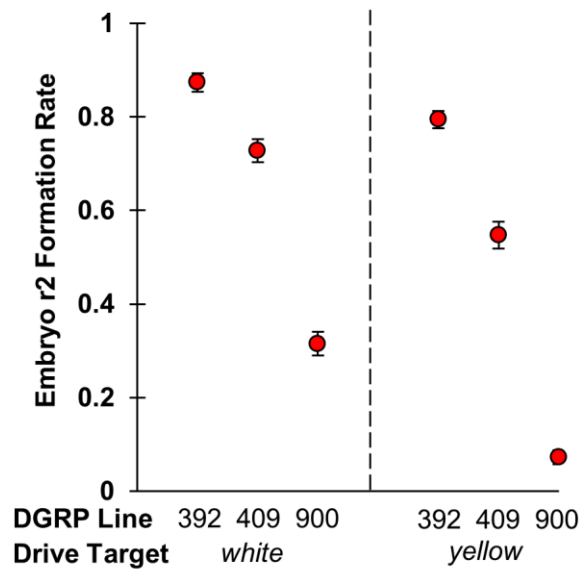

**Figure S3 Effects of genetic background are similar between drives with different target sites.** The rate of full embryo r2 resistance allele formation is shown ( $\pm$  standard error) for three DGRP lines with both the drive targeting *yellow* and a similar drive targeting *white*. The drive targeting *white* produces overall more embryo r2 resistance allele formation, but the pattern between the lines is similar.

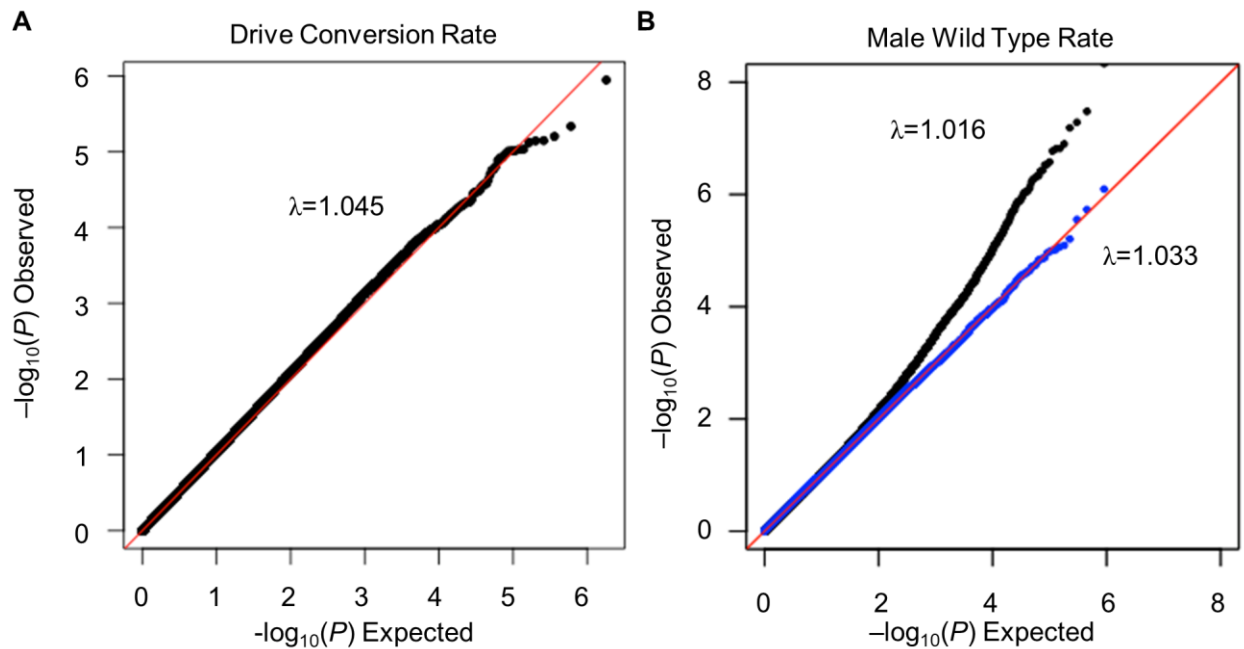

**Figure S4 Q-Q analysis of GWAS for drive performance among the DGRP lines.** A plot of expected vs. observed  $-\log_{10}(P\text{-value})$  for each hit for (A) drive conversion efficiency in heterozygote females and (B) the rate of wild-type phenotype in male progeny, with rank-normalization corrected values shown in blue.

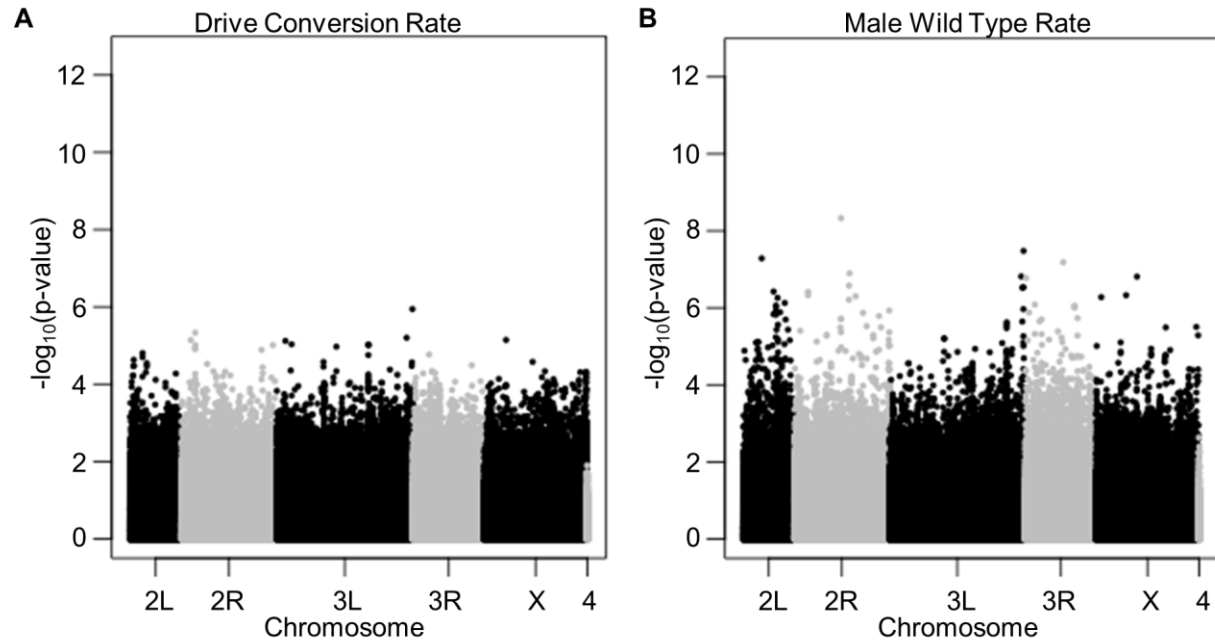

**Figure S5 Manhattan plot from GWAS analysis.** Each dot shows the location and  $P$ -value of a single polymorphism of the (A) drive conversion rate in heterozygote females and (B) the rate of wild-type phenotype in male progeny.
